# Supplementary material
Source: PubMed Central journal article supplement (PMC3947618)
Supplement: NIHMS555470-supplement-sppl_Miyadera_RPGRIP1.pdf [file NIHMS555470-supplement-sppl_Miyadera_RPGRIP1.pdf]

**Supplementary Table 1** *RPGRIP1*<sup>-/-</sup> MLHD samples used in SNP array genotyping

| Sample ID | Age             | Sex | RD phenotype | Sample source   | Notes                                   |
|-----------|-----------------|-----|--------------|-----------------|-----------------------------------------|
| AHT_D     | <2 (2)          | M   | EORD         | Research colony | -                                       |
| AHT_E     | <2 (2)          | F   | EORD         | Research colony | Excluded from GWAS analysis             |
| MLD002    | 2.7             | F   | EORD         | Family K        | Dam:MLD001                              |
| MLD021    | <<5 (2)         | M   | EORD         | Family K        | Excluded from GWAS analysis, Dam:MLD001 |
| MLD027    | 1               | F   | EORD         | Japanese pet    | WGA_PCR                                 |
| MLD028    | 1.5             | F   | EORD         | Japanese pet    | -                                       |
| MLD029    | 1.3             | M   | EORD         | Japanese pet    | -                                       |
| MLD030    | 1.8             | F   | EORD         | Japanese pet    | -                                       |
| MLD031    | 1.8             | M   | EORD         | Japanese pet    | -                                       |
| MLD032    | 3               | F   | EORD         | Japanese pet    | -                                       |
| MLD033    | 3               | F   | EORD         | Japanese pet    | -                                       |
| MLD034    | <2 (2)          | M   | EORD         | Japanese pet    | -                                       |
| MLD035    | 1.8             | F   | EORD         | Japanese pet    | -                                       |
| MLD037    | 1               | M   | EORD         | Japanese pet    | -                                       |
| MLD064    | <3.4 (3.4)      | M   | EORD         | Japanese pet    | -                                       |
| MLD066    | 2               | F   | EORD         | Japanese pet    | -                                       |
| MLD070    | 3               | F   | EORD         | Japanese pet    | WGA_PCR                                 |
| MLD078    | 1.5             | F   | EORD         | Japanese pet    | -                                       |
| MLD079    | 0.7             | M   | EORD         | Japanese pet    | -                                       |
| MLD081    | 1               | M   | EORD         | Japanese pet    | -                                       |
| MLD082    | 2               | F   | EORD         | Japanese pet    | -                                       |
| MLD083    | 2               | M   | EORD         | Japanese pet    | WGA_F29                                 |
| MLD084    | <2.5 (2.5)      | F   | EORD         | Japanese pet    | -                                       |
| MLD085    | 1.4             | F   | EORD         | Japanese pet    | -                                       |
| MLD088    | 2.5             | F   | EORD         | Japanese pet    | WGA_F29                                 |
| MLD105    | 0.3             | F   | EORD         | Japanese pet    | -                                       |
| MLD113    | <3.3 (3.3)      | M   | EORD         | Japanese pet    | -                                       |
| MLD117    | 1               | F   | EORD         | Japanese pet    | -                                       |
| MLD124    | <<4.5 (2)       | F   | EORD         | Japanese pet    | -                                       |
| MLD142    | 2.5-3 (3)       | M   | EORD         | Japanese pet    | -                                       |
| MLD222    | 2.8             | F   | EORD         | Japanese pet    | -                                       |
| MLD234    | 2.9             | M   | EORD         | Japanese pet    | -                                       |
| MLD455    | 3               | F   | EORD         | Japanese pet    | Dam:MLD453                              |
| MLD004    | 2.4-5.2 (5.2)   | F   | MORD         | Family K        | Excluded from analysis, Dam:MLD002      |
| MLD023    | 5               | M   | MORD         | Japanese pet    | -                                       |
| MLD025    | 4               | M   | MORD         | Japanese pet    | -                                       |
| MLD112    | 3.5-4.5 (4.5)   | M   | MORD         | Japanese pet    | -                                       |
| MLD001    | 9.2-10.6 (10.6) | F   | LORD         | Family K        | Excluded from GWAS analysis             |
| MLD003    | 7.8-9.3 (9.3)   | F   | LORD         | Family K        | Excluded from GWAS analysis, Dam:MLD002 |
| MLD005    | >10.8 (10.8)    | M   | LORD         | Family K        | Excluded from GWAS analysis, Dam:MLD001 |
| MLD007    | 9.4             | M   | LORD         | Family K        | Excluded from GWAS analysis, Dam:MLD001 |
| MLD009    | 5.2-6.6 (6.6)   | M   | LORD         | Family K        | Excluded from GWAS analysis, Dam:MLD002 |
| MLD022    | 7               | M   | LORD         | Japanese pet    | -                                       |
| MLD024    | 9               | M   | LORD         | Japanese pet    | -                                       |
| MLD039    | 7               | F   | LORD         | Japanese pet    | -                                       |
| MLD061    | 8               | F   | LORD         | Japanese pet    | -                                       |
| MLD103    | 15              | M   | LORD         | Japanese pet    | -                                       |
| MLD114    | 8.5             | M   | LORD         | Japanese pet    | -                                       |
| MLD115    | 9               | F   | LORD         | Japanese pet    | -                                       |
| MLD151    | 6               | M   | LORD         | Japanese pet    | -                                       |
| MLD291    | 5.6             | M   | LORD         | Japanese pet    | -                                       |
| MLD435    | 10              | M   | LORD         | Japanese pet    | -                                       |

|          |          |   |        |              |                                         |
|----------|----------|---|--------|--------------|-----------------------------------------|
| MLD436   | 9        | F | LORD   | Japanese pet | -                                       |
| MLD438   | 9.8      | M | LORD   | Japanese pet | -                                       |
| MLD443   | 7.8      | F | LORD   | Japanese pet | -                                       |
| MLD445   | ~16 (16) | M | LORD   | Japanese pet | -                                       |
| MLD446   | 15       | F | LORD   | Japanese pet | -                                       |
| MLD006   | 8.9      | M | Normal | Family K     | Excluded from GWAS analysis, Dam:MLD001 |
| MLD008   | 5.6      | M | Normal | Family K     | Excluded from GWAS analysis, Dam:MLD004 |
| MLD010   | 6.1      | F | Normal | Family K     | Excluded from GWAS analysis, Dam:MLD004 |
| MLD011   | 5.2      | M | Normal | Family K     | Excluded from GWAS analysis, Dam:MLD001 |
| MLD012   | 5.7      | F | Normal | Family K     | Excluded from GWAS analysis, Dam:MLD003 |
| MLD087   | 4.8      | F | Normal | Japanese pet | -                                       |
| MLD102   | 5        | F | Normal | Japanese pet | -                                       |
| MLD104   | 6.9      | M | Normal | Japanese pet | -                                       |
| MLD106   | 10.4     | M | Normal | Japanese pet | -                                       |
| MLD127   | 8.6      | M | Normal | Japanese pet | -                                       |
| MLD130   | 5.3      | F | Normal | Japanese pet | -                                       |
| MLD132   | 8.5      | M | Normal | Japanese pet | -                                       |
| MLD134   | 10       | F | Normal | Japanese pet | -                                       |
| MLD153   | 10.4     | M | Normal | Japanese pet | -                                       |
| MLD201   | 9.2      | F | Normal | Japanese pet | WGA_PCR                                 |
| MLD214   | 9.8      | F | Normal | Japanese pet | -                                       |
| MLD219   | 7        | M | Normal | Japanese pet | WGA_PCR                                 |
| MLD235   | 9.9      | F | Normal | Japanese pet | -                                       |
| MLD242   | 12.4     | F | Normal | Japanese pet | -                                       |
| MLD265   | 5.4      | F | Normal | Japanese pet | -                                       |
| MLD269   | 4.9      | F | Normal | Japanese pet | -                                       |
| MLD288   | 9.4      | M | Normal | Japanese pet | -                                       |
| MLD343   | 7.2      | M | Normal | Japanese pet | -                                       |
| MLD345   | 6        | M | Normal | Japanese pet | -                                       |
| MLD354   | 5.3      | F | Normal | Japanese pet | -                                       |
| MLD366   | 14       | F | Normal | Japanese pet | -                                       |
| MLD369   | 8        | F | Normal | Japanese pet | -                                       |
| MLD370   | 10.4     | F | Normal | Japanese pet | -                                       |
| MLD405   | 10.7     | F | Normal | Japanese pet | -                                       |
| MLD413   | 6        | M | Normal | Japanese pet | -                                       |
| MLD415   | 5.5      | F | Normal | Japanese pet | -                                       |
| MLD424   | 8.8      | M | Normal | Japanese pet | -                                       |
| MLD453   | 9.4      | F | Normal | Japanese pet | -                                       |
| AHT11044 | 6.3      | M | Normal | UK pet       | -                                       |
| AHT11056 | 7.7      | F | Normal | UK pet       | -                                       |
| AHT11057 | 8.8      | M | Normal | UK pet       | -                                       |
| AHT11058 | 6.4      | F | Normal | UK pet       | -                                       |
| AHT11062 | 7.7      | F | Normal | UK pet       | -                                       |
| AHT11063 | 5.4      | F | Normal | UK pet       | -                                       |

The ages denote the onset of RD in affected dogs and the timing of last examination in Normal dogs. Where a definite age was unavailable, the value shown in brackets was used in the PLINK analysis. Some samples were prepared by whole genome amplification either by PCR-based (WGA\_PCR, GenomePlex®; Sigma-Aldrich) or Phi29 DNA polymerase-based (WGA\_F29, illustra GenomiPhi V2; GE Healthcare) methods.

**Supplementary Table 2** Primer sequences for canine *LRAT*

| Gene        | Featrure                | Forward primer sequence (5'>3') | Reverse primer sequence (5'>3') | Nt from <i>LRAT</i> |       |
|-------------|-------------------------|---------------------------------|---------------------------------|---------------------|-------|
|             |                         |                                 |                                 | Start               | End   |
| <i>LRAT</i> | Exon 1-2                | TGCAGGTGAGGTCCCCG               | CTGCTCTTTAGTCGTTTCGAC           | -63                 | 823   |
|             | Exon 3                  | GGTACGTGTGATCCTTCTCAG           | CATGTTTTCATCTGAACGAGGG          | 4706                | 5389  |
|             | Upstream                | ACAGGACAAACGAAACGTC             | GGAGTCGCTGGTGTTAATC             | -2759               | -2037 |
|             |                         | CCCCAAAGTTTACAACCGCTCA          | GCCCCGATTCGGAGCTAATA            | -2091               | -1643 |
|             |                         | TCTGCTTTTCGATCCGTTTG            | CCTGCAAAGGCGGATTAACG            | -1960               | -1367 |
|             |                         | ACCCCGAAGCTAGGGAAAT             | GGCGAAACGCACCTGGG               | -1412               | -721  |
|             |                         | CCCAGGTGCGTTTCGCC               | CAGCTTCTCCAGCAACAGG             | -737                | 47    |
|             | Intron                  | CGGAGTGTGGCGATTGCAG             | TGTAAGGTGACGGATGTTAGC           | 716                 | 1630  |
|             |                         | GCCAAGTCTCTGTTTTATTGAGA         | CCAAACTGTTACATCATTCAAAGT        | 1493                | 2437  |
|             |                         | TGTTGCTGCCTAACACCTCTTGTG        | ATCGAGTTTTTCAGGACAATGAGAA       | 2371                | 3298  |
|             |                         | GCCAAGCACCTTTTCTCATTGTCC        | ATGATCCATACCCCTGAGGAAG          | 3263                | 4177  |
|             |                         | AGAGGGTAGTCTGGACAAGTT           | TGCTGAAGCAAGAACAATTCTCTG        | 4014                | 4825  |
|             | Human 3'-UTR equivalent | CTAAACTAAACGATTTTCCCCTCGT       | AAGTCTAGCTTGTGGCCTAGTTTTT       | 5350                | 6198  |
|             |                         | AGTGAGCGTTCATGTACTTTTGC         | GAGATCGTGAAATTACAACAGGTCA       | 6134                | 6866  |
|             |                         | TGCTAGACACTGACCTGTTGTAAT        | TCCACTGCCGTTTCATAAAG            | 6832                | 7723  |
|             |                         | GCAATGATCAAGTGATGCAAG           | GGCTCCCAGATGTAGATGACA           | 7658                | 8537  |

**Supplementary Table 3** Primer sequences for the coding regions of canine *MAP9*, *GUCY1A3*, and *GUCY1B3*

| <b>Gene</b>    | <b>Exon</b> | <b>Forward primer sequence (5'&gt;3')</b> | <b>Reverse primer sequence (5'&gt;3')</b> |
|----------------|-------------|-------------------------------------------|-------------------------------------------|
| <i>MAP9</i>    | 1           | CAGACCCGGTCAGAGTTTGAAT                    | CGTAGTAAAAACCTAGTACTGAAGC                 |
| <i>MAP9</i>    | 2           | TTCTCCTGCCCTAAATACACG                     | TGACAGGCATCCTTTTACTGC                     |
| <i>MAP9</i>    | 3           | TGCCTAAGTTAGCTGTGTTTATAGAGC               | TGCAAGACTGACATGCAACTGG                    |
| <i>MAP9</i>    | 4           | GCATCCTGGTAGTCGTTGAAG                     | ACAGTGCCGTGATCATTCAATA                    |
| <i>MAP9</i>    | 5           | TTGAGATGCCGGTGAACGTACT                    | GCTTGGGGTAGGTTGCCCTTAC                    |
| <i>MAP9</i>    | 6           | AGATGAATGTAATTGCTCTCCTTG                  | GGAGTTTTCCACAGACAGTTCAGA                  |
| <i>MAP9</i>    | 7           | TTGGCCCTAAGCCTAACTGTGA                    | GGTGTCCCGTGTCTTATCA                       |
| <i>MAP9</i>    | 8           | CCTGCCAACTCCTGAAATAGAGG                   | CCTTGGTGAATGGGTAACCTTGT                   |
| <i>MAP9</i>    | 9           | TTCTTAACTCATGCTCGTCTTTACG                 | CTAATGGTGCCGACGTGTTGAT                    |
| <i>MAP9</i>    | 10-12       | TCGTATCTACCTGTCTCCGTCTGT                  | ACAGATTCCACAAGGCAGCTCT                    |
| <i>MAP9</i>    | 13          | CCCCACATGCAGTCACTTACCA                    | CAGTCCCACAGAGAAAACACA                     |
| <i>MAP9</i>    | 14-15       | TGTGCTAGATCACTTAGGGCAAC                   | TGACTGTTGTCTGTTGGGGAGTG                   |
| <i>MAP9</i>    | 16          | GGAAATTATAACTTGGGTTATCTG                  | GTTGCTGTGAAAACACGATGG                     |
| <i>MAP9</i>    | 17          | CTTCAGCAAGCAACCTGATTTG                    | GATTGTCACGTTAAGTCTGGGACA                  |
| <i>GUCY1A3</i> | 1           | TTTTCTGGACCAGTGCATAGCGG                   | CTCGCGTCCACGCTCCACAG                      |
| <i>GUCY1A3</i> | 2           | TGTGTAGCATTGTGCTCCTGCCA                   | GGCCAGTCAGGAAGACCTGGA                     |
| <i>GUCY1A3</i> | 3           | TTGTGGTAGGGACATGTGGAATGC                  | GCCTTGAAAGTGAGAAAGCACGC                   |
| <i>GUCY1A3</i> | 4           | GGCTGTCAGCGAGACCACCC                      | AGCAGCAGTACACGGCGACA                      |
| <i>GUCY1A3</i> | 5           | TTCTTCCCATCCCCCTAGTTGGC                   | ATGAGTCAGCTTCCCATGCGGC                    |
| <i>GUCY1A3</i> | 6           | TGTTACCAGACGTAAGGGAAC                     | TTCATTTCTAGTCCTTAACCAAGA                  |
| <i>GUCY1A3</i> | 7           | GCGTCAGCGTCCCCTTAGTGA                     | CCAGGATGCGGCTTGACAGAGA                    |
| <i>GUCY1A3</i> | 8           | GCCACTCCCTGATGTTGTGCT                     | ACACAGACGTTTGCCGACTGC                     |
| <i>GUCY1A3</i> | 9           | TGGTGACCGTGCGAGGTGTG                      | TCAGCGTGGGGGAAGACAGGA                     |
| <i>GUCY1A3</i> | 10          | TCTGAGCACATTAGGGCACGCT                    | TGTGTTGAATTTGAGTACAGGT                    |
| <i>GUCY1B3</i> | 1           | CCGTTAAACTGGGGGCGGG                       | CCGCGTGGACAAACACACACTT                    |
| <i>GUCY1B3</i> | 2           | TCAGGCATTGCATTGGGCATTAGA                  | CCTCCACCATCGTGCAGCGT                      |
| <i>GUCY1B3</i> | 3           | TCCACTTGCACAAAAGTTGGGGAT                  | GGATGTTCAAGGTGGGCAACCA                    |
| <i>GUCY1B3</i> | 4           | TCAACGCAACCACCACTCTCT                     | TGCTCGTGCAGCACTGTTTTGGT                   |
| <i>GUCY1B3</i> | 5           | AAGCCTACCCGGACAAGAGGGTA                   | AGCCAGCCGTCCTAGGGAAAGTT                   |
| <i>GUCY1B3</i> | 6           | TGCATGGAGCCTCTTTCTCCCT                    | TTCCACCGCCCTCAGGCAAATA                    |
| <i>GUCY1B3</i> | 7           | AGCCCTCGCAAAGGTCTTACCA                    | ACACTCGCAAAGTATTGAGACAGG                  |
| <i>GUCY1B3</i> | 8           | ACAGACCAGGTTGCACAGGACA                    | ACAGGCCCGTGCCTTTTTAGT                     |
| <i>GUCY1B3</i> | 9           | ACAGCTTCTACTGTGAGGCCA                     | AACAGTGACTGCGTGGAGGCTGTA                  |
| <i>GUCY1B3</i> | 10          | GGCAGTGGCTCTTGTGCCGTA                     | CTTTGCCCTCAAGGTGTCTTTCT                   |
| <i>GUCY1B3</i> | 11          | CAGGTTCAAGTAGATGGCGAATCTGT                | TGAGAGTTAAACCACACGTAACGACAC               |
| <i>GUCY1B3</i> | 12          | AGCAGAACGGAAACCACTGGAGA                   | TCACAGCCCTCTCGCCTCAGC                     |
| <i>GUCY1B3</i> | 13          | GTGGCCCTGTTTACCCAGAAT                     | AGAGCGCCTAACATTTATCCCAAGC                 |

**Supplementary Fig. 1** SNP genotypes of 83 *RPGRIP1*<sup>-/-</sup> MLHDs at the CFA15 locus associated with EORD. EORD (red header), MORD (orange header) and LORD (yellow header) samples are shown in the order of the onset age (except individuals with atypical haplotypes), while Normal samples (green header) are shown in the order of the age at examination. SNP alleles in light blue boxes represent the predominant allele in EORD, while those in light yellow boxes represent the alternative allele. The 1.49-Mb region of homozygosity shared by 90% of the EORD cases is outlined in red. The Dog ID of the UK dogs is shown in blue.

**Supplementary Fig. 2** Haplotype combinations of the locus associated with EORD. Haplotype blocks were inferred using the controls (M1: 15 LORD + 34 Normal). Haplotype 'a' corresponds to the major haplotype in the EORD cases. Alternative haplotypes (b-g) are indicated in different color blocks where alternative SNP alleles are shown in white letters. Left, four different haplotype pairs in the EORD cases (n=31). Right, haplotype pairs in the controls (n=49) are shown where both haplotype frequencies are  $\geq 0.03$ . Haplotype frequencies in the controls: a=0.22, b=0.22, c=0.09, d=0.07, e=0.05, f=0.03, g=0.03.



| Cases (EORD) |     |     |     | Phenotype    | Controls (LORD + Normal) |     |     |     |     |     |     |     |     |     |     |     |     |     |    |
|--------------|-----|-----|-----|--------------|--------------------------|-----|-----|-----|-----|-----|-----|-----|-----|-----|-----|-----|-----|-----|----|
| 28           | 1   | 1   | 1   | No. of dogs  | 4                        | 3   | 3   | 2   | 2   | 2   | 2   | 2   | 2   | 2   | 1   | 1   | 1   | 1   | 23 |
| a a          | b c | a - | - - | Haplotype ID | a b                      | a a | a d | b b | c c | b c | b d | a f | a e | d d | b g | b f | a g | - - |    |
| A A          | A A | A A | A A | 55.66        | A A                      | A A | A G | A A | A A | A A | A G | A G | A A | G G | A G | A G | A G | - - |    |
| T T          | T T | T T | T T | 55.76        | T T                      | T T | T T | T T | T T | T T | T T | T T | T T | T T | T C | T T | T C | - - |    |
| G G          | G A | G G | G G | 55.86        | G G                      | G G | G A | G G | A A | G A | G A | G A | G A | A A | G G | G A | G G | - - |    |
| G G          | G G | G G | G G | 55.94        | G G                      | G G | G G | G G | G G | G G | G G | G A | G G | G G | G A | G A | G A | - - |    |
| A A          | G G | A G | G G | 56.11        | A G                      | A A | A A | G G | G G | G G | G A | A A | A G | A A | G G | G A | A G | - - |    |
| G G          | A G | G A | G G | 56.28        | G A                      | G G | G G | A A | G G | A G | A G | G G | G G | G G | A A | A G | A G | - - |    |
| G G          | G G | G G | G G | 56.29        | G G                      | G G | G A | G G | G G | G G | G A | G A | G G | A A | G G | A G | G G | - - |    |
| T T          | T C | T T | T C | 56.36        | T T                      | T T | T T | T T | C C | T C | T T | T T | T T | T T | T T | T T | T T | - - |    |
| C C          | T C | C C | C C | 56.38        | C T                      | C C | C C | T T | C C | T C | T C | C T | C T | C C | T T | T T | T T | - - |    |
| A A          | G G | A A | A G | 56.46        | A G                      | A A | A A | G G | G G | G G | G A | A A | A A | A A | G G | T A | A G | - - |    |
| T T          | G G | T G | T G | 56.46        | T G                      | T T | T G | G G | G G | G G | G G | T T | T G | G G | G G | G T | T G | - - |    |
| A A          | A G | A A | A G | 56.51        | A A                      | A A | A A | A A | G G | A G | A A | A A | A G | A A | A G | A A | A G | - - |    |
| C C          | G C | C G | C C | 56.62        | C G                      | C C | C G | G G | C C | G C | G G | C G | C C | G G | G G | G G | C G | - - |    |

CFA15 (Mb)

Minor haplotypes

Supplementary Fig. 2
